# Supplementary material
Source: ML conference proceedings conference paper supplement (https://proceedings.neurips.cc/paper_files/paper/2023/hash/0f0a30c7b46be23a83317c5cb721fc43-Abstract.html)
Supplement: Supplementary file 1 [file 0f0a30c7b46be23a83317c5cb721fc43-Supplemental-Conference.zip]

Archive with 1 entries (1 files):
- SupplementaryMaterial/Hybrid_Policy_Optimization_Appendix.pdf
